# Supplementary material for: Novel Antimicrobial Agents for Gram-Negative Pathogens
Source: MDPI journal article supplement (doi:10.3390/antibiotics12040761), 2023-04-16
Supplement: s1 [file s1]

## SUPPLEMENT

### References:

National Center for Biotechnology Information. The PubChem Project. Available from: <https://pubchem.ncbi.nlm.nih.gov/> (accessed 24.03.23) [Reference 181]

Kim S, Chen J, Cheng T, et al. PubChem 2023 update. *Nucleic Acids Res.* 2023;51(D1):D1373–D1380. [doi:10.1093/nar/gkac956](https://doi.org/10.1093/nar/gkac956) [Reference 182]

### S-1. Cefiderocol

**Chemical name:** Cefiderocol

**Pubchem CID:** 77843966

**Molecular formula:** C<sub>30</sub>H<sub>34</sub>ClN<sub>7</sub>O<sub>10</sub>S<sub>2</sub>

**Molecular Weight:** 752.2 g/mol

**IUPAC Name:** (6R,7R)-7-[[[(2Z)-2-(2-amino-1,3-thiazol-4-yl)-2-(2-carboxypropan-2-yl)oxyimino]acetyl]amino]-3-[[[1-[2-[(2-chloro-3,4-dihydroxybenzoyl)amino]ethyl]pyrrolidin-1-ium-1-yl]methyl]-8-oxo-5-thia-1-azabicyclo[4.2.0]oct-2-ene-2-carboxylate

**2D structure:**

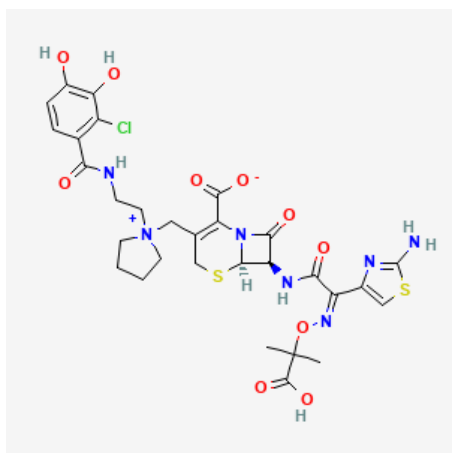

<https://pubchem.ncbi.nlm.nih.gov/compound/77843966> (accessed 24.03.23)

###

### S-2. Imipenem-Cilastatin-Relebactam

#### Imipenem

**Chemical name:** Imipenem

**Pubchem CID:** 104838

**Molecular formula:** C<sub>12</sub>H<sub>17</sub>N<sub>3</sub>O<sub>4</sub>S

**Molecular Weight:** 299.35g/mol

**IUPAC Name:** (5R,6S)-3-[2-(aminomethylideneamino)ethylsulfanyl]-6-[(1R)-1-hydroxyethyl]-7-oxo-1-azabicyclo[3.2.0]hept-2-ene-2-carboxylic acid

**2D structure:**

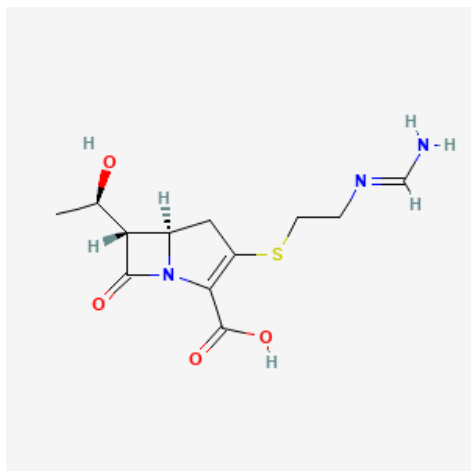

<https://pubchem.ncbi.nlm.nih.gov/compound/104838> (accessed 24.03.23)

## Cilastatin

**Chemical name:** Cilastatin

**Pubchem CID:** 6435415

**Molecular formula:** C<sub>16</sub>H<sub>26</sub>N<sub>2</sub>O<sub>5</sub>S

**Molecular Weight:** 358.5g/mol

**IUPAC Name:** (Z)-7-[(2R)-2-amino-2-carboxyethyl]sulfanyl-2-[[[(1S)-2,2-dimethylcyclopropanecarbonyl]amino]hept-2-enoic acid

**2D structure:**

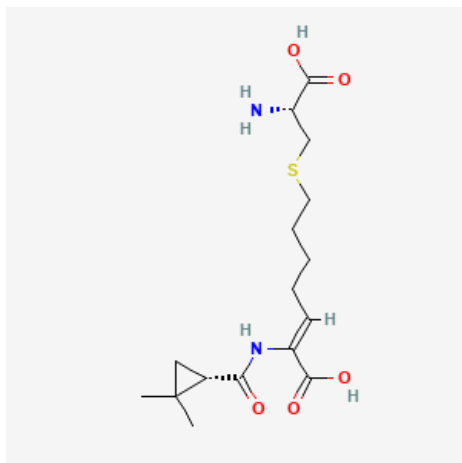

<https://pubchem.ncbi.nlm.nih.gov/compound/6435415> (accessed 24.03.23)

## Relebactam

**Chemical name:** Relebactam

**Pubchem CID:** 44129647

**Molecular formula:** C<sub>12</sub>H<sub>20</sub>N<sub>4</sub>O<sub>6</sub>S

**Molecular Weight:** 348.38g/mol

**IUPAC Name:** [(2S,5R)-7-oxo-2-(piperidin-4-ylcarbamoyl)-1,6-diazabicyclo[3.2.1]octan-6-yl] hydrogen sulfate

**2D structure:**

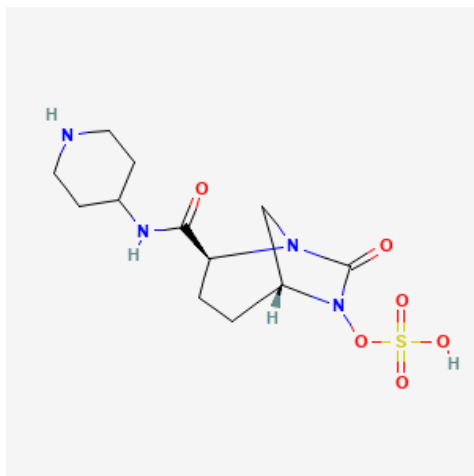

<https://pubchem.ncbi.nlm.nih.gov/compound/44129647> (accessed 24.03.23)

###

### S-3. Meropenem - Vaborbactam

#### Meropenem

**Chemical name:** Meropenem

**Pubchem CID:** 441130

**Molecular formula:** C<sub>17</sub>H<sub>25</sub>N<sub>3</sub>O<sub>5</sub>S

**Molecular Weight:** 383.5g/mol

**IUPAC Name:** (4R,5S,6S)-3-[(3S,5S)-5-(dimethylcarbamoyl)pyrrolidin-3-yl]sulfanyl-6-[(1R)-1-hydroxyethyl]-4-methyl-7-oxo-1-azabicyclo[3.2.0]hept-2-ene-2-carboxylic acid

**2D structure:**

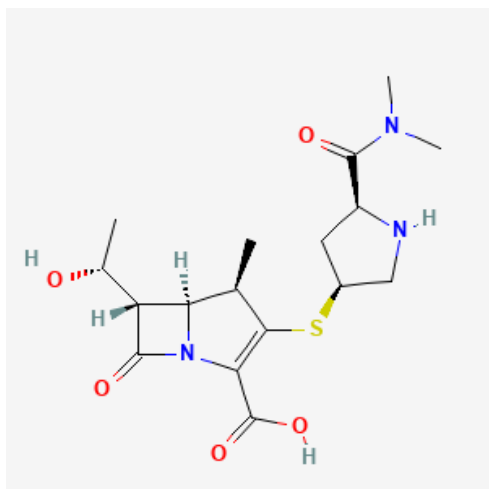

<https://pubchem.ncbi.nlm.nih.gov/compound/441130> (accessed 24.03.23)

## Vaborbactam

**Chemical name:** Vaborbactam

**Pubchem CID:** 56649692

**Molecular formula:** C<sub>12</sub>H<sub>16</sub>BNO<sub>5</sub>S

**Molecular Weight:** 297.14g/mol

**IUPAC Name:** 2-[(3R,6S)-2-hydroxy-3-[(2-thiophen-2-ylacetyl)amino]oxaborinan-6-yl]acetic acid

**2D structure:**

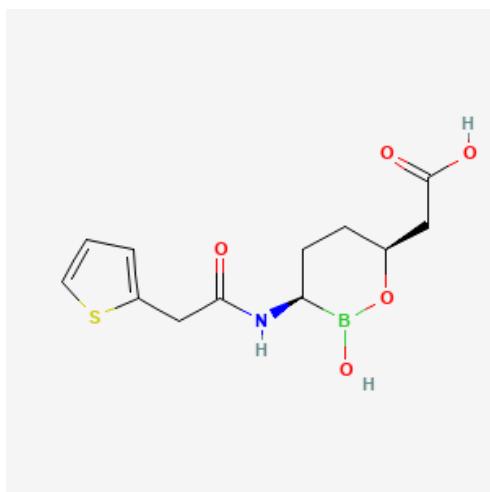

<https://pubchem.ncbi.nlm.nih.gov/compound/56649692> (accessed 24.03.23)

###

## S-4. Eravacycline

**Chemical name:** Eravacycline

**Pubchem CID:** 54726192

**Molecular formula:** C<sub>27</sub>H<sub>31</sub>FN<sub>4</sub>O<sub>8</sub>

**Molecular Weight:** 558.6g/mol

**IUPAC Name:** (4S,4aS,5aR,12aR)-4-(dimethylamino)-7-fluoro-1,10,11,12a-tetrahydroxy-3,12-dioxo-9-[(2-pyrrolidin-1-ylacetyl)amino]-4a,5,5a,6-tetrahydro-4H-tetracene-2-carboxamide

**2D structure:**

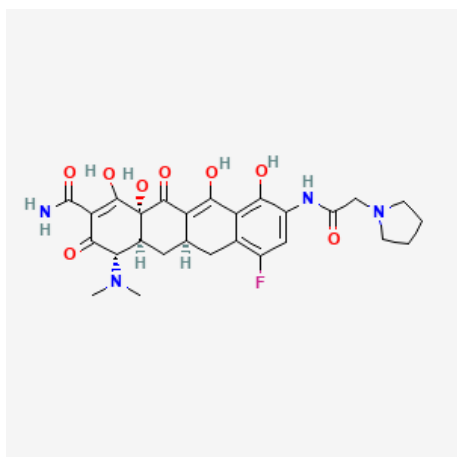

<https://pubchem.ncbi.nlm.nih.gov/compound/56951485> (accessed 24.03.23)

###

### S-5. Omadacycline

**Chemical name:** Omadacycline

**Pubchem CID:** 54697325

**Molecular formula:** C<sub>29</sub>H<sub>40</sub>N<sub>4</sub>O<sub>7</sub>

**Molecular Weight:** 556.6g/mol

**IUPAC Name:** (4S,4aS,5aR,12aR)-4,7-bis(dimethylamino)-9-[(2,2-dimethylpropylamino)methyl]-1,10,11,12a-tetrahydroxy-3,12-dioxo-4a,5,5a,6-tetrahydro-4H-tetracene-2-carboxamide

**2D structure:**

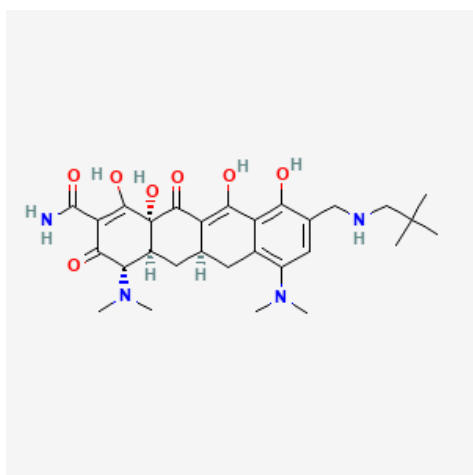

<https://pubchem.ncbi.nlm.nih.gov/compound/54697325> (accessed 24.03.23)

###

### S-6. Plazomicin

**Chemical name:** Plazomicin

**Pubchem CID:** 42613186

**Molecular formula:** C<sub>25</sub>H<sub>48</sub>N<sub>6</sub>O<sub>10</sub>

**Molecular Weight:** 592.7g/mol

**IUPAC Name:** (2S)-4-amino-N-[(1R,2S,3S,4R,5S)-5-amino-4-[[[(2S,3R)-3-amino-6-[(2-hydroxyethylamino)methyl]-3,4-dihydro-2H-pyran-2-yl]oxy]-2-[(2R,3R,4R,5R)-3,5-dihydroxy-5-methyl-4-(methylamino)oxan-2-yl]oxy-3-hydroxycyclohexyl]-2-hydroxybutanamide

**2D structure:**

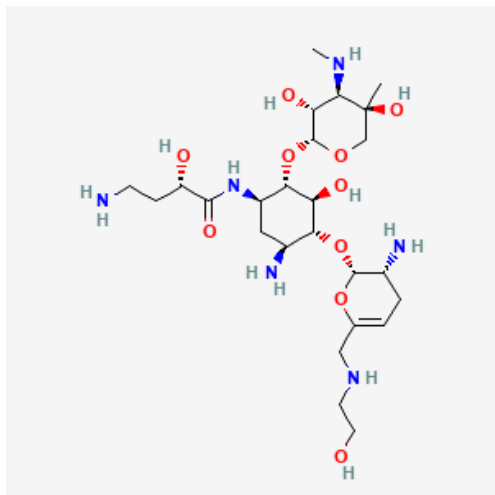

<https://pubchem.ncbi.nlm.nih.gov/compound/42613186> (accessed 24.03.23)

###

## S-7. Aztreonam - Avibactam

### Aztreonam

**Chemical name:** aztreonam

**PubChem CID:** 5742832

**Molecular Formula:** C<sub>13</sub>H<sub>17</sub>N<sub>5</sub>O<sub>8</sub>S<sub>2</sub>

**Molecular Weight:** 435.4g/mol

**IUPAC Name:** 2-[(Z)-[1-(2-amino-1,3-thiazol-4-yl)-2-[[[(2S,3S)-2-methyl-4-oxo-1-sulfoazetidin-3-yl]amino]-2-oxoethylidene]amino]oxy-2-methylpropanoic acid

**2D structure:**

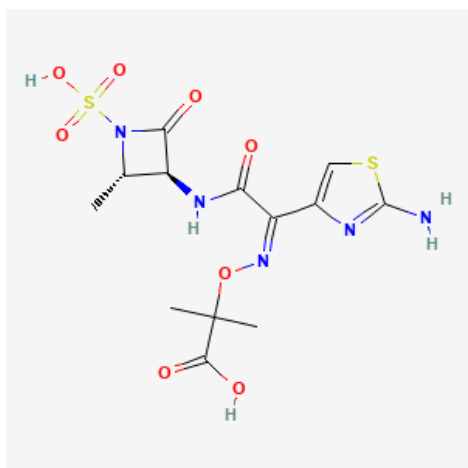

<https://pubchem.ncbi.nlm.nih.gov/compound/5742832> (accessed 24.03.23)

## Avibactam

**Chemical name:** avibactam

**PubChem CID:** 9835049

**Molecular Formula:** C<sub>7</sub>H<sub>11</sub>N<sub>3</sub>O<sub>6</sub>S

**Molecular Weight:** 265.25g/mol

**IUPAC Name:** [(2S,5R)-2-carbamoyl-7-oxo-1,6-diazabicyclo[3.2.1]octan-6-yl]

hydrogen sulfate

**2D structure:**

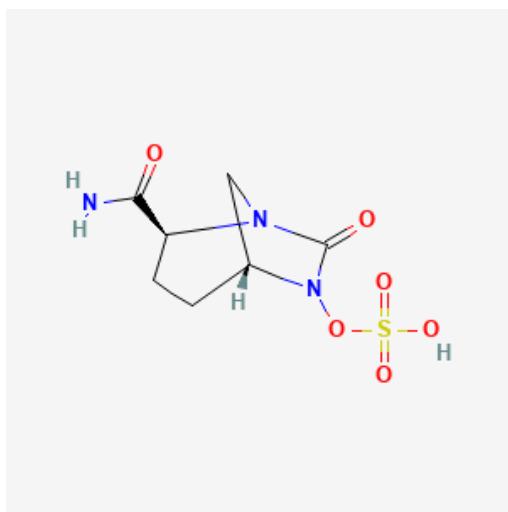

<https://pubchem.ncbi.nlm.nih.gov/compound/9835049> (accessed 24.03.23)

###

## S-8. Cefepime - Enmetazobactam

## S-9. Cefepime - Zidebactam

## S.10. Cefepime - Taniborbactam

## Cefepime

**Chemical name:** cefepime

**PubChem CID:** 5479537

**Molecular Formula:** C<sub>19</sub>H<sub>24</sub>N<sub>6</sub>O<sub>5</sub>S<sub>2</sub>

**Molecular Weight:** 480.6g/mol

**IUPAC Name:** (6R,7R)-7-[[[(2Z)-2-(2-amino-1,3-thiazol-4-yl)-2-methoxyiminoacetyl]amino]-3-[(1-methylpyrrolidin-1-ium-1-yl)methyl]-8-oxo-5-thia-1-azabicyclo[4.2.0]oct-2-ene-2-carboxylate

**2D structure:**

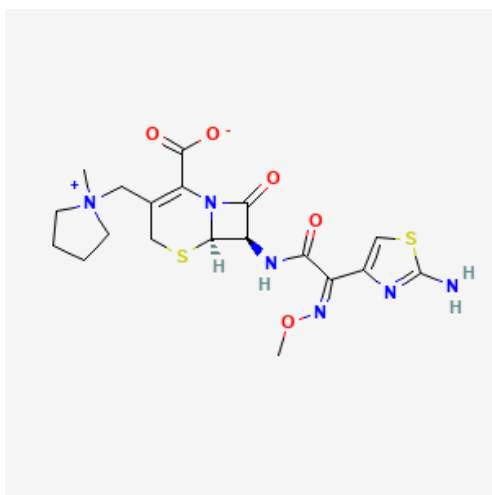

<https://pubchem.ncbi.nlm.nih.gov/compound/5479537> (accessed 24.03.23)

## Enmetazobactam

**Chemical name:** enmetazobactam

**PubChem CID:** 23653540

**Molecular Formula:** C<sub>11</sub>H<sub>14</sub>N<sub>4</sub>O<sub>5</sub>S

**Molecular Weight:** 314.32g/mol

**IUPAC Name:** (2S,3S,5R)-3-methyl-3-[(3-methyltriazol-3-ium-1-yl)methyl]-4,4,7-trioxo-4λ<sup>6</sup>-thia-1-azabicyclo[3.2.0]heptane-2-carboxylate

**2D structure:**

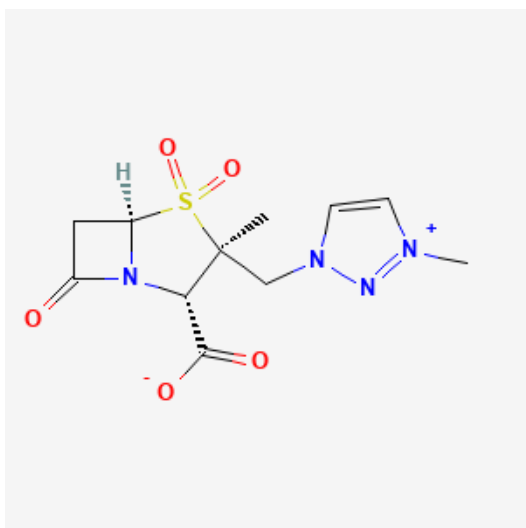

<https://pubchem.ncbi.nlm.nih.gov/compound/23653540> (accessed 24.03.23)

## Zidebactam

**Chemical name:** zidebactam

**PubChem CID:** 77846445

**Molecular Formula:** C<sub>13</sub>H<sub>21</sub>N<sub>5</sub>O<sub>7</sub>S

**Molecular Weight:** 391.4g/mol

**IUPAC Name:** [(2S,5R)-7-oxo-2-[[[(3R)-piperidine-3-carbonyl]amino]carbamoyl]-1,6-diazabicyclo[3.2.1]octan-6-yl] hydrogen sulfate

**2D structure:**

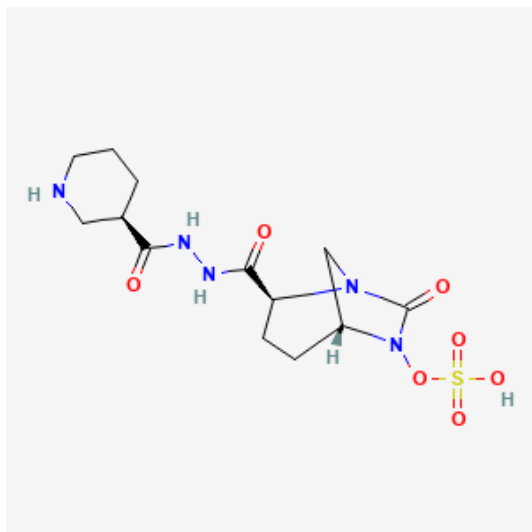

<https://pubchem.ncbi.nlm.nih.gov/compound/77846445> (accessed 24.03.23)

## Taniborbactam

**Chemical name:** taniborbactam

**PubChem CID:** 76902493

**Molecular Formula:** C<sub>19</sub>H<sub>28</sub>BN<sub>3</sub>O<sub>5</sub>

**Molecular Weight:** 389.3g/mol

**IUPAC Name:** (3R)-3-[[2-[4-(2-aminoethylamino)cyclohexyl]acetyl]amino]-2-hydroxy-3,4-dihydro-1,2-benzoxaborinine-8-carboxylic acid

**2D structure:**

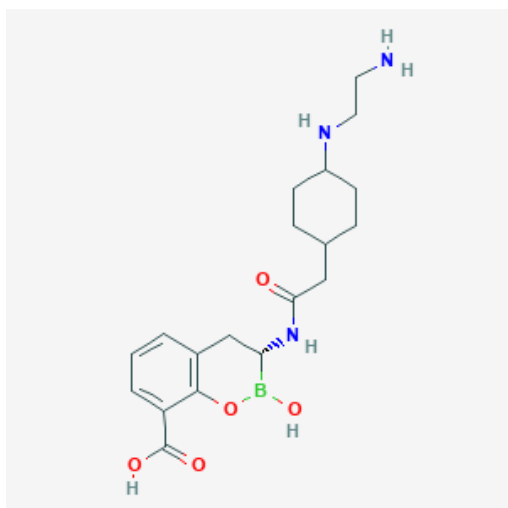

<https://pubchem.ncbi.nlm.nih.gov/compound/76902493> (accessed 24.03.23)

###

## S-11. Sulbactam - Durlobactam

### Sulbactam

**Chemical name:** sulbactam

**PubChem CID:** 130313

**Molecular Formula:** C<sub>8</sub>H<sub>11</sub>NO<sub>5</sub>S

**Molecular Weight:** 233.24g/mol

**IUPAC Name:** (2S,5R)-3,3-dimethyl-4,4,7-trioxo-4lambda6-thia-1-azabicyclo[3.2.0]heptane-2-carboxylic acid

**2D structure:**

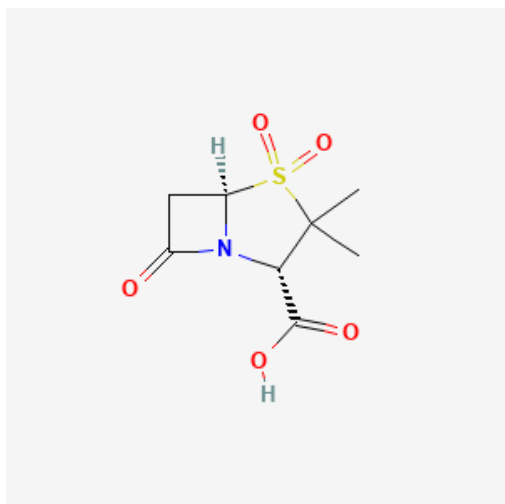

<https://pubchem.ncbi.nlm.nih.gov/compound/130313> (accessed 24.03.23)

### Durlobactam

**Chemical name:** durlobactam

**PubChem CID:** 89851852

**Molecular Formula:** C<sub>8</sub>H<sub>11</sub>N<sub>3</sub>O<sub>6</sub>S

**Molecular Weight:** 277.26g/mol

**IUPAC Name:** [(2S,5R)-2-carbamoyl-3-methyl-7-oxo-1,6-diazabicyclo[3.2.1]oct-3-en-6-yl] hydrogen sulfate

**2D structure:**

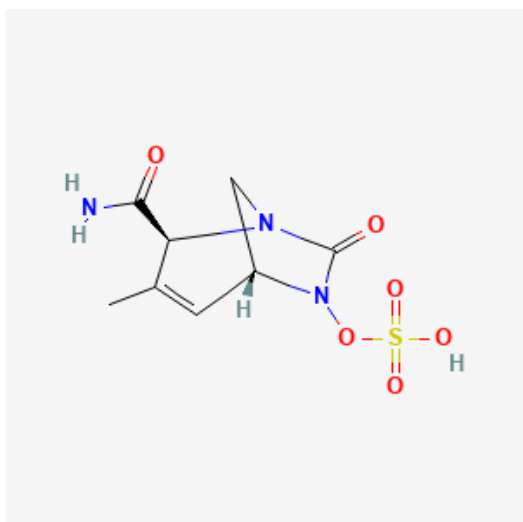

<https://pubchem.ncbi.nlm.nih.gov/compound/89851852> (accessed 24.03.23)

###

## S-12. Sulopenem

**Chemical name:** sulopenem

**PubChem CID:** 9950244

**Molecular Formula:** C<sub>12</sub>H<sub>15</sub>NO<sub>5</sub>S<sub>3</sub>

**Molecular Weight:** 349.5g/mol

**IUPAC Name:** (5R,6S)-6-[(1R)-1-hydroxyethyl]-7-oxo-3-[(1R,3S)-1-oxothiolan-3-yl]sulfanyl-4-thia-1-azabicyclo[3.2.0]hept-2-ene-2-carboxylic acid

**2D structure:**

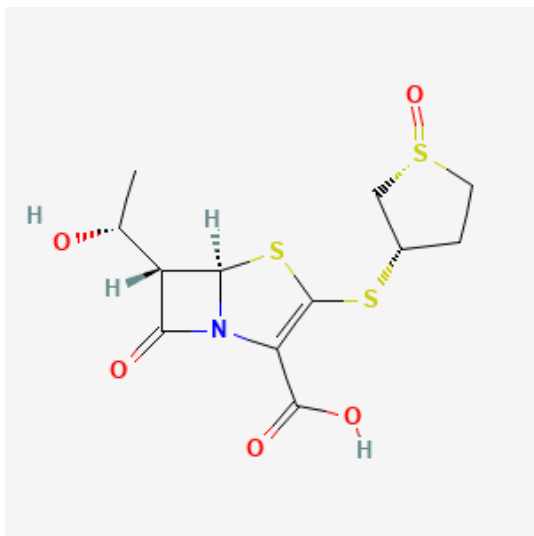

<https://pubchem.ncbi.nlm.nih.gov/compound/9950244> (accessed 24.03.23)

###

### S-13. Tebipenem

**Chemical name:** tebipenem

**PubChem CID:** 9800194

**Molecular Formula:** C<sub>16</sub>H<sub>21</sub>N<sub>3</sub>O<sub>4</sub>S<sub>2</sub>

**Molecular Weight:** 383.5g/mol

**IUPAC Name:** (4R,5S,6S)-3-[1-(4,5-dihydro-1,3-thiazol-2-yl)azetidin-3-yl]sulfanyl-6-[(1R)-1-hydroxyethyl]-4-methyl-7-oxo-1-azabicyclo[3.2.0]hept-2-ene-2-carboxylic acid

**2D structure:**

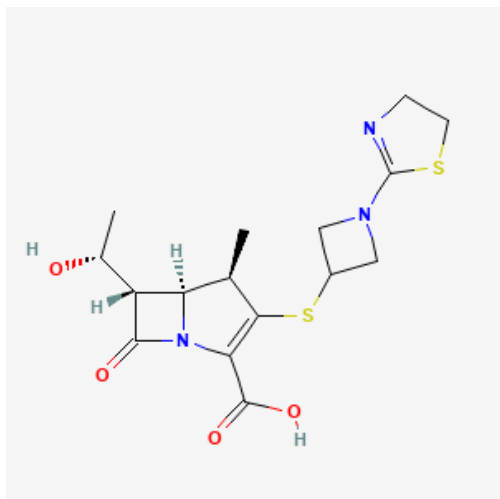

<https://pubchem.ncbi.nlm.nih.gov/compound/9800194> (accessed 24.03.23)

###

### S-14. Benapenem

**Chemical name:** benapenem

**PubChem CID:** 58326208

**Molecular Formula:** C<sub>22</sub>H<sub>28</sub>N<sub>4</sub>O<sub>7</sub>S<sub>2</sub>

**Molecular Weight:** 524.6g/mol

**IUPAC Name:** (4R,5S,6S)-6-[(1R)-1-hydroxyethyl]-4-methyl-7-oxo-3-[(3S,5S)-5-[(4-sulfamoylphenyl)methylcarbamoyl]pyrrolidin-3-yl]sulfanyl-1-azabicyclo[3.2.0]hept-2-ene-2-carboxylic acid

**2D structure:**

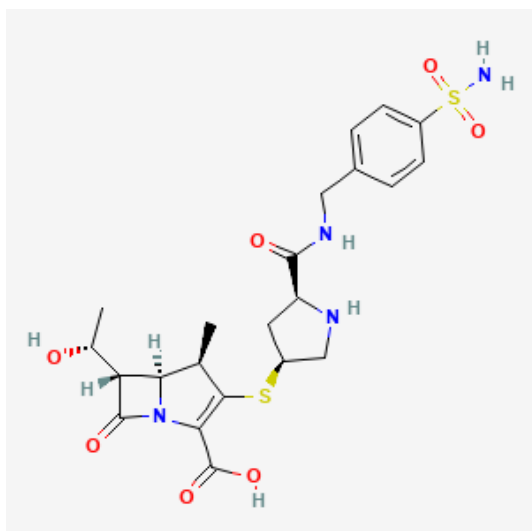

<https://pubchem.ncbi.nlm.nih.gov/compound/58326208> (accessed 24.03.23)
